# Supplementary material
Source: Springer Nature journal article supplement (https://www.springermedizin.de/resource/supplementary/12875_2010_469_MOESM2_ESM.pdf/9434672)

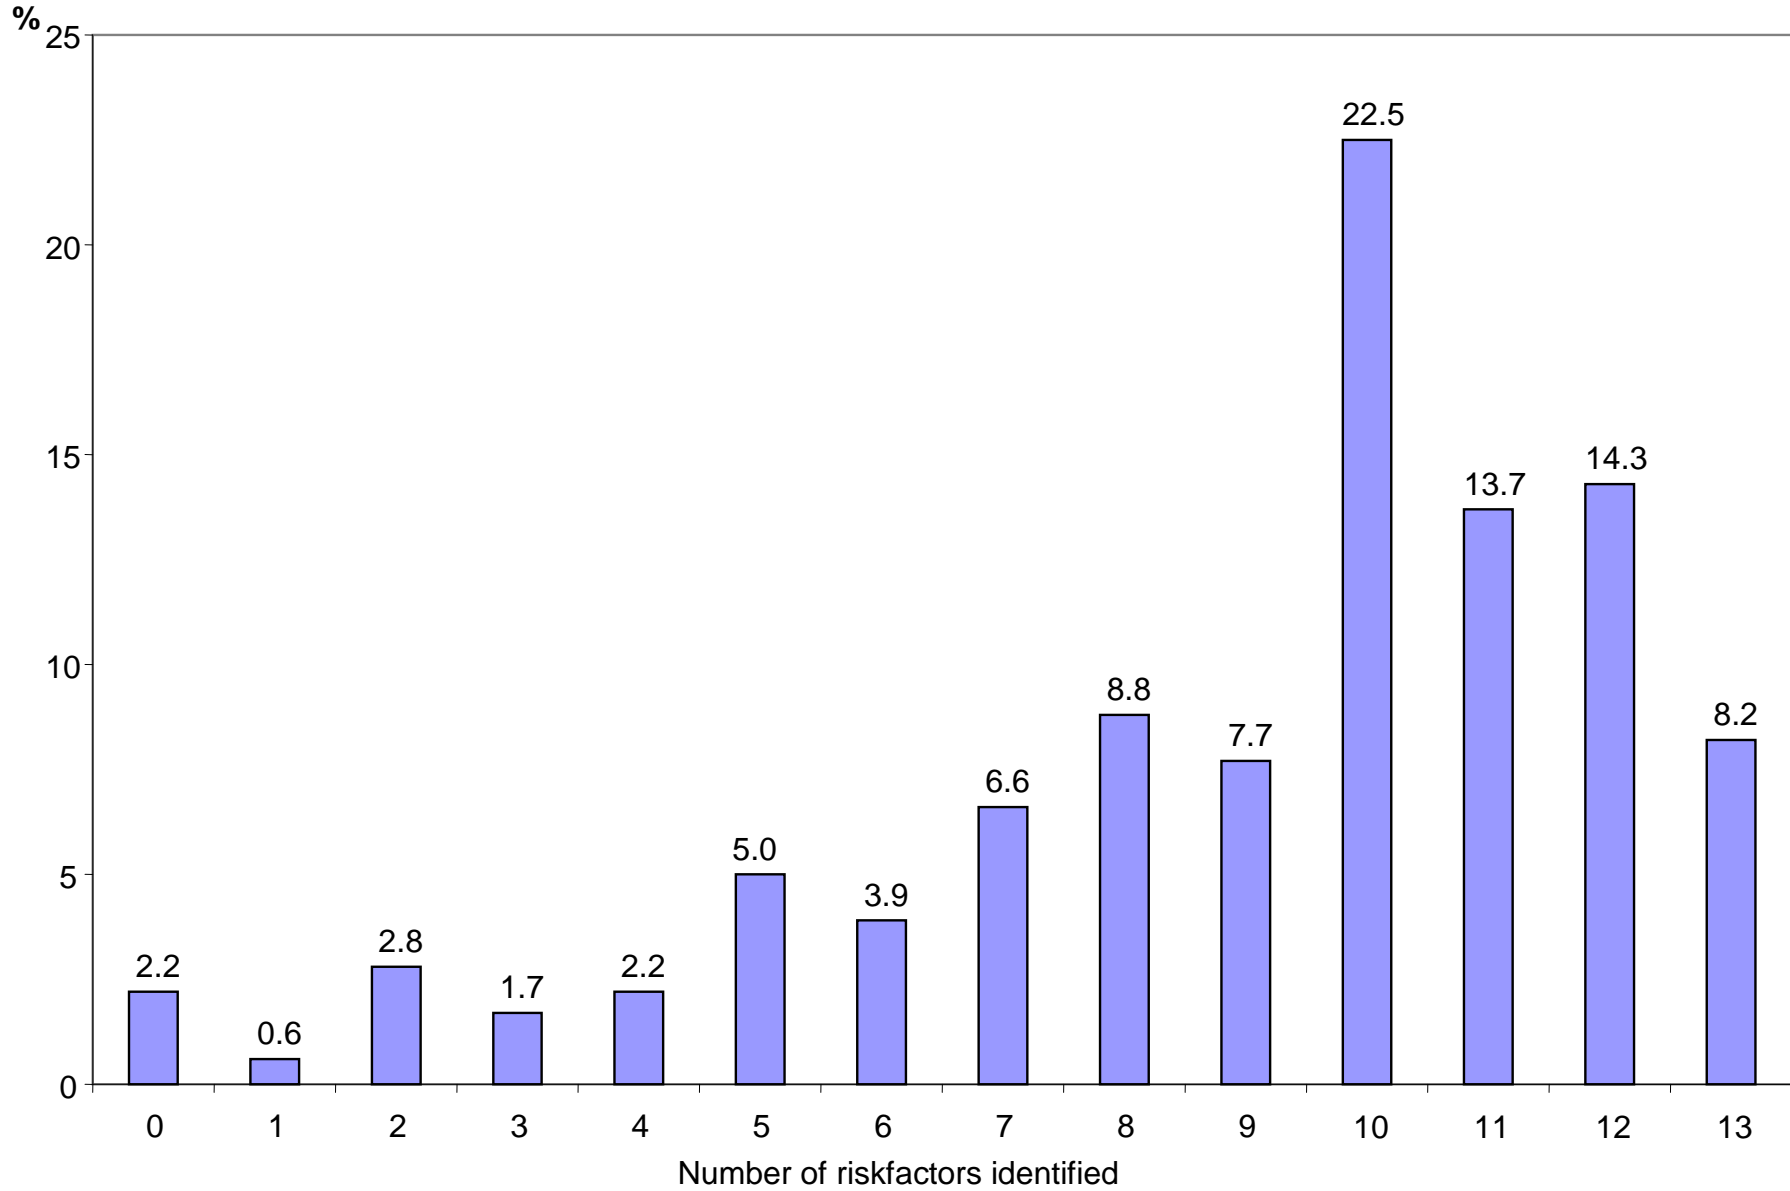

Supplement: MOESM2 [file 9434672]
